# STAT3 regulates glycolysis via targeting hexokinase 2 in hepatocellular carcinoma cells

Man Li<sup>1,2</sup>, Rui Jin<sup>3</sup>, Weihua Wang<sup>4</sup>, Tieying Zhang<sup>2</sup>, Jiao Sang<sup>1</sup>, Na Li<sup>1</sup>, Qunying Han<sup>1</sup>, Wenxuan Zhao<sup>1</sup>, Chunyan Li<sup>1</sup>, Zhengwen Liu<sup>1</sup>

<sup>1</sup>Department of Infectious Diseases, First Affiliated Hospital of Xi'an Jiaotong University, Xi'an 710061, Shaanxi, People's Republic of China

<sup>2</sup>Department of Internal Medicine, The Third Hospital of Xi'an, Xi'an 710021, Shaanxi, People's Republic of China

<sup>3</sup>Department of Radiology, Second Affiliated Hospital of Xi'an Jiaotong University, Xi'an 710004, Shaanxi, People's Republic of China

<sup>4</sup>Department of Pharmacogenomics, The Fourth Military Medical University, Xi'an 710032, Shaanxi, People's Republic of China

**Correspondence to:** Zhengwen Liu, **email:** liuzhengwen@medmail.com.cn

**Keywords:** hepatocellular carcinoma, signal transducer and activator of transcription 3, hexokinase 2, glycolysis, rapamycin

**Received:** August 02, 2016

**Accepted:** February 15, 2017

**Published:** March 01, 2017

**Copyright:** Li et al. This is an open-access article distributed under the terms of the Creative Commons Attribution License (CC-BY), which permits unrestricted use, distribution, and reproduction in any medium, provided the original author and source are credited.

## ABSTRACT

**Signal transducer and activator of transcription 3 (STAT3) and hexokinase 2 (HK2) are involved in hepatocellular carcinoma (HCC). Deregulation of cellular energetics involving an increase in glycolysis is a characteristic of HCC. This study examined whether STAT3 regulates HCC glycolysis through the HK2 pathway in HCC cells. Human HCC cell lines HepG2 and Hep3B cells were transfected with pcDNA3.1(+)-EGFP-STAT3, STAT3 siRNA and HK2 siRNA, respectively, or treated with rapamycin, an inhibitor of mammalian target of rapamycin (mTOR), and the effects on STAT3 and HK2 expression and cell glycolysis were determined. STAT3 and HK2 expressions were evaluated by real-time polymerase chain reaction and Western blotting. The level of glycolysis metabolism was assessed by the determination of glucose consumption and lactate production. The results showed that transfection of HepG2 and Hep3B cells with pcDNA3.1(+)-EGFP-STAT3 significantly increased STAT3 mRNA and protein expression, glucose consumption and lactate production, and HK2 mRNA and protein expression. However, transfection of HepG2 and Hep3B cells with STAT3 siRNA significantly decreased glucose consumption and lactate production and HK2 mRNA and protein expression. Transfection of HepG2 and Hep3B cells with HK2 siRNA significantly decreased glucose consumption and lactate production. Treatment of HepG2 and Hep3B cells with rapamycin significantly reduced HK2 mRNA and protein expression and glucose consumption and lactate production. These results suggest that mTOR-STAT3-HK2 pathway is involved in the glycolysis of HCC cells and STAT3 may regulate HCC glycolysis through HK2 pathway, providing potential multiple therapeutic targets through intervention of glycolysis for the treatment of HCC.**

## INTRODUCTION

Cancer cells preferentially use aerobic glycolysis to metabolize glucose [1, 2]. High glycolysis, a phenomenon known as the “Warburg effect” [3], is often observed in various cancers [4, 5]. The first step of aerobic glycolysis is catalyzed by enzyme hexokinase [6]. Hexokinase 2 (HK2), an isoform of hexokinase, catalyzes the first irreversible step of the glycolysis and helps couple ATP

formation in mitochondria to glucose phosphorylation, resulting in cancer cell growth, survival and metastasis [4–10].

Signal transducer and activator of transcription 3 (STAT3) signalling is a major pathway in cancer initiation and malignant progression [11–13]. STAT3 has been revealed to potentiate glucose metabolism and accelerate glycolysis by upregulating HK2 in breast, bladder, and ovarian cancer cells [14–18].

HK2 expression in hepatocellular carcinoma (HCC) has been shown to be associated with tumor grade and stage as well as increased mortality of HCC, suggesting the biologic and prognostic significance of HK2 in HCC [19, 20]. Overexpression of HK2 in HCC cells has been shown to be associated with increased tumor cell survival and proliferation and resistance to the anticancer agent cisplatin [21]. Furthermore, HK2 expression has been indicated to be significantly correlated with STAT3 expression in hepatitis B virus (HBV)-related HCC [22]. Deregulation of cellular energetics involving an increase in glycolysis is also a characteristic of HCC [23, 24]. However, whether the HCC glycolysis is attributable to STAT3 and whether HK2 pathway is correlated to this process remain largely unknown. Therefore, this study investigated the potential mechanism of STAT3 attribution to HCC glycolysis through regulating HK2 in HCC cells.

## RESULTS

### Effect of STAT3 on glycolysis in HepG2 and Hep3B cells

The plasmids pcDNA3.1-STAT3 (pcDNA3.1-S) and pcDNA3.1-Mock (pcDNA3.1-M) were successfully

constructed. DNA sequencing confirmed the correctness of sequence of the constructs. The Immunofluorescent staining results showed significant increase of STAT3 expression in HepG2 and Hep3B cells transfected with pcDNA3.1-STAT3 in comparison with pcDNA3.1-Mock (Figure 1).

HepG2 and Hep3B cells transfected with pcDNA3.1-STAT3 (pcDNA3.1-S) showed significantly increased STAT3 mRNA and protein expressions (both  $P < 0.05$ , Figure 2A) and significantly elevated glucose consumption and lactate production (both  $P < 0.05$ , Figure 2B) compared with cells transfected with pcDNA3.1-Mock (pcDNA3.1-M). Furthermore, the transfection of HepG2 and Hep3B cells with STAT3 siRNA significantly decreased the glucose consumption and lactate production in HepG2 and Hep3B cells compared with negative controls (both  $P < 0.05$ , Figure 2C, Supplementary Table 1).

### Effect of STAT3 on hexokinase 2 expression and hexokinase 2 silencing on glycolysis

HepG2 and Hep3B cells transfected with pcDNA3.1-STAT3 (pcDNA3.1-S) significantly increased HK2 mRNA and protein expressions (both  $P < 0.05$ , Figure 3A) compared with pcDNA3.1-Mock (pcDNA3.1-M). However,

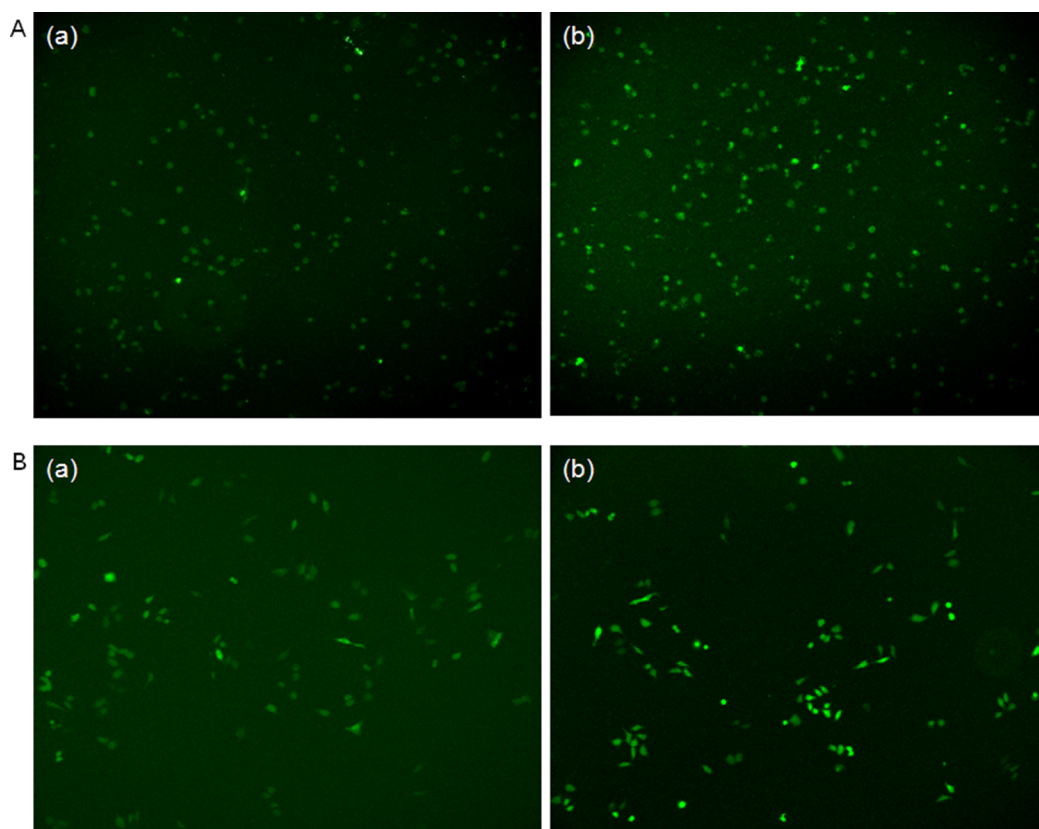

**Figure 1: Immunofluorescent staining of STAT3 expression in HepG2 and Hep3B cells transfected with pcDNA3.1-STAT3 in comparison with pcDNA3.1-Mock plasmids.** (A), (a) HepG2 cells transfected with pcDNA3.1-Mock plasmid for 48 h. (b) HepG2 cells transfected with pcDNA3.1-STAT3 plasmid for 48 h. (B) (a) Hep3B cells transfected with pcDNA3.1-Mock plasmid for 48 h. (b) Hep3B cells transfected with pcDNA3.1-STAT3 plasmid for 48 h.

the transfection of HepG2 and Hep3B cells with STAT3 siRNA significantly decreased HK2 mRNA and protein expressions (both  $P < 0.05$ , Figure 3B). Furthermore, the glucose consumption and lactate production in HepG2 and Hep3B cells were significantly decreased when the cells were transfected with HK2 siRNA compared with those transfected with negative control RNA (both  $P < 0.05$ , Figure 3C, Supplementary Table 1).

### Effect of rapamycin on hexokinase 2 expression and glycolysis

To examine the effect of rapamycin on the glycolysis through mTOR-HK2 pathway in the cells used, treatment of HepG2 and Hep3B cells with rapamycin was performed. The treatment of HepG2 and Hep3B cells with rapamycin significantly decreased the HK2 mRNA and protein expression (both  $P < 0.05$ , Figure 4A) and the glucose consumption and lactate production

(both  $P < 0.05$ , Figure 4B, Supplementary Table 1) compared with negative controls.

## DISCUSSION

STAT3 plays a critical role in tumor development, angiogenesis, and metastasis [25, 26]. It has also been shown that STAT3 promotes HCC initiation and malignant progression and blocking the activation of STAT3 inhibits the growth of human HCC [12, 27–30]. Reprogramming of metabolism involving an increase in glycolysis is a characteristic feature of HCC [23, 24]. Whether STAT3 may potentiate HCC energy metabolism remains largely unknown. To this end, we examined the effect of STAT3 on glucose metabolism in HepG2 and Hep3B cells. The results showed that overexpression of STAT3 in cells transfected with pcDNA3.1-S dramatically increased the glucose consumption and lactate production in HepG2 and Hep3B cells, while the downregulation of STAT3 by

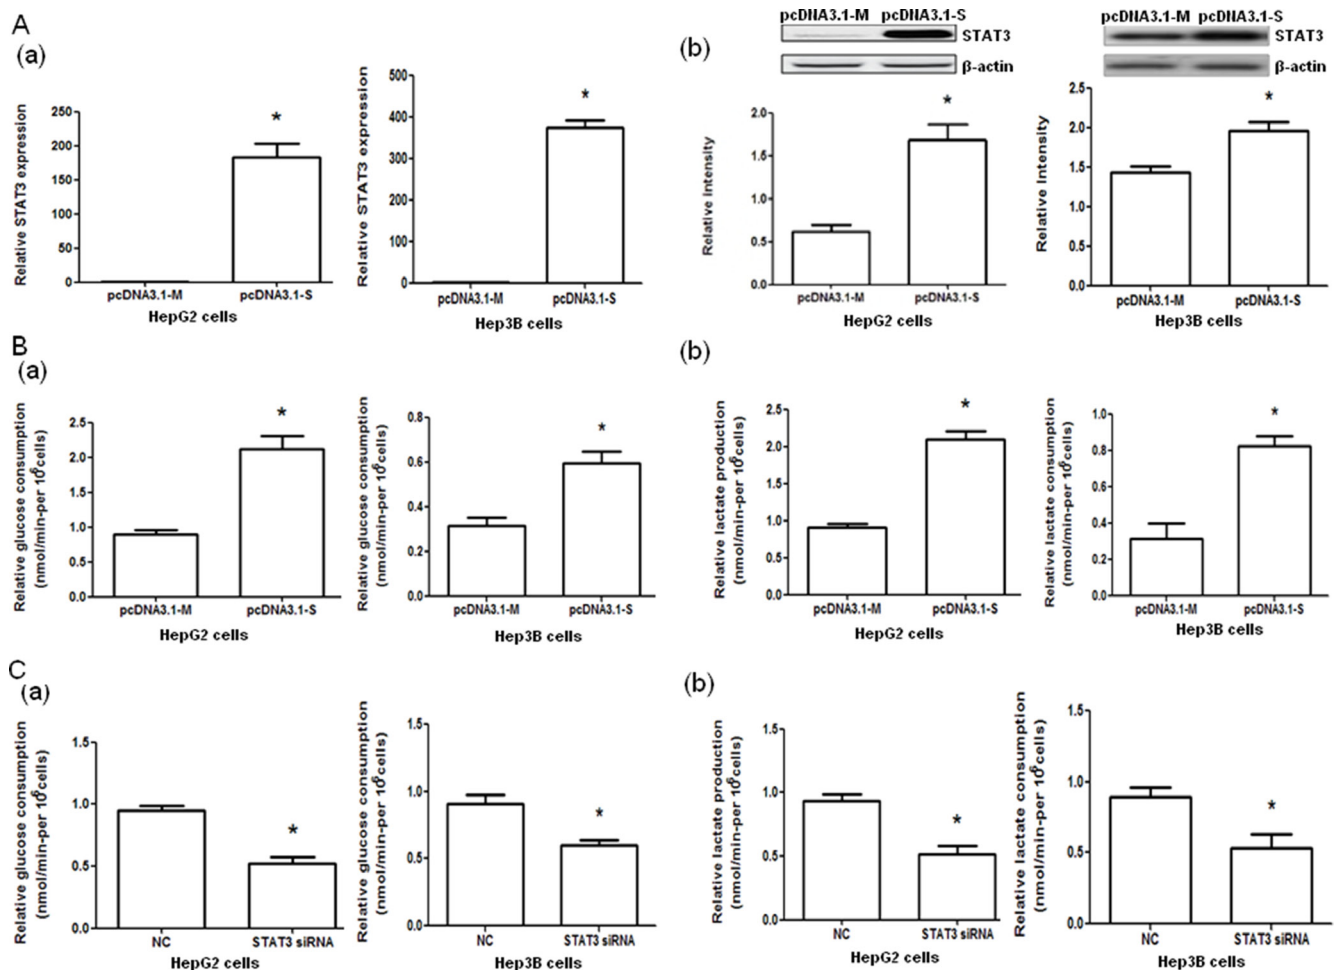

**Figure 2: STAT3 mRNA and protein expressions and glucose consumption and lactate production in HepG2 and Hep3B cells with STAT3 overexpression and interference.** (A) The STAT3 mRNA (a) and protein (b) expression in HepG2 and Hep3B cells transfected with control pcDNA3.1-Mock (pcDNA3.1-M) and pcDNA3.1-STAT3 (pcDNA3.1-S) determined by quantitative PCR and Western blot analysis, respectively. (B) The glucose consumption (a) and lactate production (b) of HepG2 and Hep3B cells transfected with control (pcDNA3.1-M) or pcDNA3.1-STAT3 (pcDNA3.1-S). (C) The glucose consumption (a) and lactate production (b) in HepG2 and Hep3B cells transfected with negative control (NC) RNA and STAT3 siRNA. \* $P < 0.05$ .

siRNA dramatically reduced the glucose consumption and lactate production, indicating that STAT3 enhances glycolysis in HCC cells.

“Warburg effect” is frequently observed in a variety of cancers [1–3]. HK2, the first rate-limiting enzyme of glycolysis, helps cancer cell with a highly glycolytic metabolism and promotes cancer cell proliferation [5–7]. HK2 is overexpressed in HCC [19] and has been documented as a pivotal player in the “Warburg effect” of HCC [21]. Studies have uncovered the potential role of STAT3 activation in glycolysis of cancer cells via HK2 pathway in breast cancer [17] and ovarian cancer cells [18]. Whether the role of HK2 in HCC is controlled by STAT3 has not been explored. Therefore, we examined the effects of STAT3 on the expression of HK2. Overexpression of STAT3 upregulated HK2 mRNA and protein expression, whereas silencing of STAT3 downregulated HK2 mRNA

and protein expression. Furthermore, the silencing of HK2 is associated with reduced glucose consumption and lactate production. These results support that STAT3 regulates glycolysis through HK2 in HCC cells.

STAT3 is well known as a downstream factor of mTOR [31, 32] and rapamycin can down-regulate STAT3 expression through mTOR. The mTOR-STAT3 signaling pathway plays a crucial role in regulating cell growth, survival and metabolism [32–34]. Studies have reported that mTOR-STAT3 contributes to the process of proto-oncogenes and tumor suppressors by modulating the expression of various genes required for tumor cell survival, proliferation, angiogenesis, and metastasis [35, 36]. Our study indicated that STAT3 is a transcriptional activator for HK2. Rapamycin inhibited HK2 mRNA and protein expression. The glucose consumption and lactate production were dramatically reduced by rapamycin. These

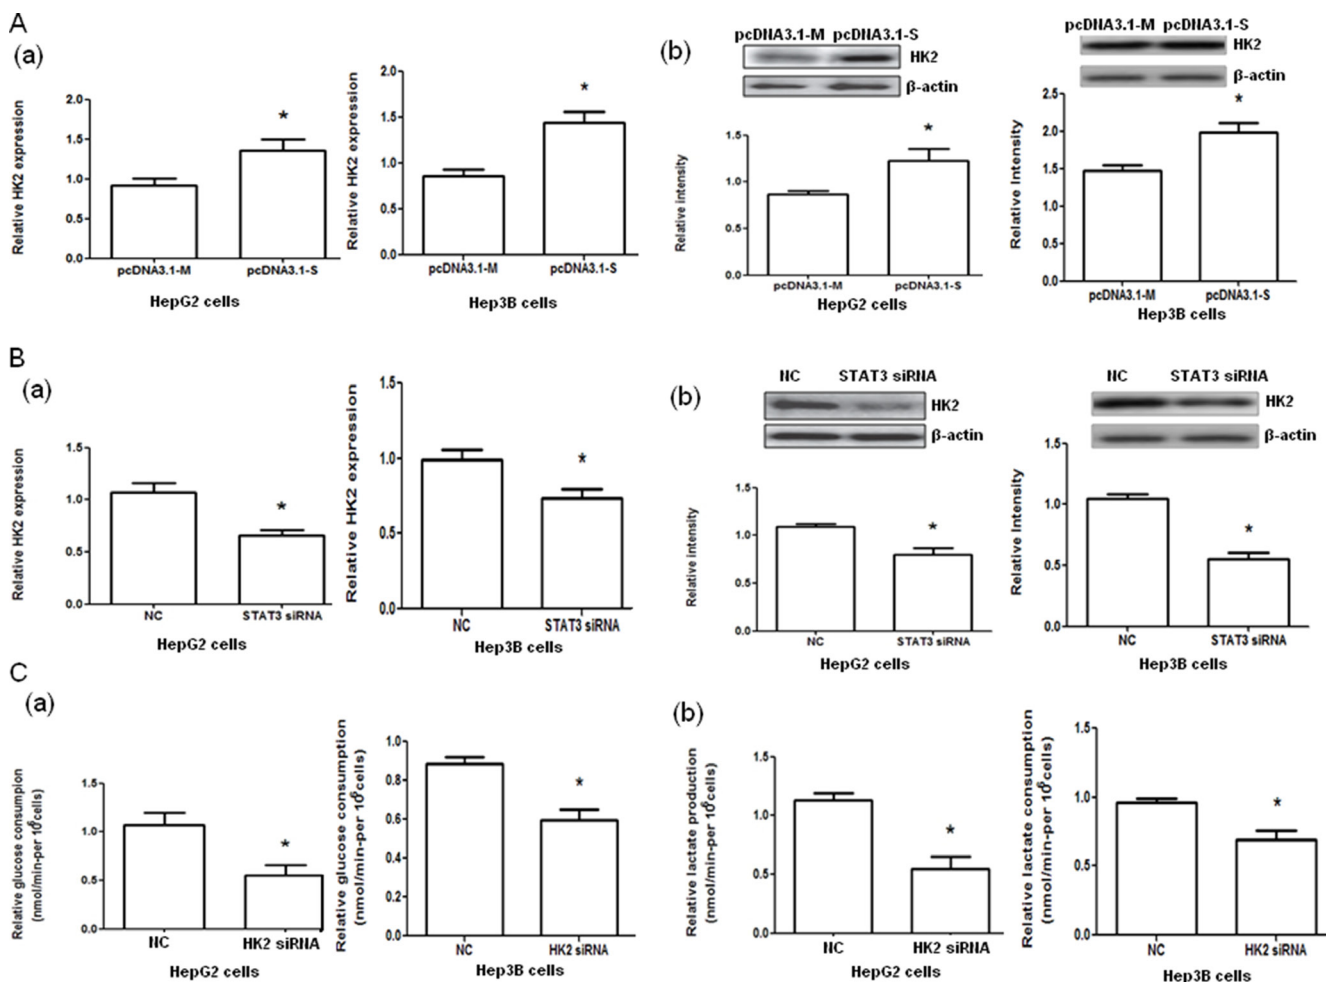

**Figure 3: Hexokinase 2 (HK2) mRNA and protein expression in HepG2 and Hep3B cells with STAT3 overexpression and interference and glucose consumption and lactate production in HepG2 and Hep3B cells with HK2 interference.** (A) The HK2 mRNA (a) and protein (b) expression in HepG2 and Hep3B cells transfected with pcDNA3.1-Mock (pcDNA3.1-M) and pcDNA3.1-STAT3 (pcDNA3.1-S) determined by quantitative PCR and Western blot analysis, respectively. (B) The HK2 mRNA (a) and protein (b) expression in HepG2 and Hep3B cells transfected with negative control (NC) or STAT3 siRNA determined by quantitative PCR and Western blot analysis, respectively. (C) The glucose consumption (a) and lactate production (b) in HepG2 and Hep3B cells transfected with negative control (NC) RNA or HK2 siRNA. \* $P < 0.05$ .



results suggest that rapamycin decreases glycolysis by mTOR-STAT3-HK2 pathway in HCC cells.

Rapamycin treatment, interference of STAT3 or inhibition of HK2, alone or in combination, has been indicated to be able to suppress the growth of HCC cells [23, 32, 36–40] and the invasion and metastasis behavior of HCC cells [30]. Our study provides evidence that STAT3 promotes HCC cell glycolysis metabolism via HK2 and the mTOR-STAT3-HK2 pathway is involved in the glycolysis of HCC cells, suggesting the potential by blocking HCC glycolysis through targeting multiple molecules of mTOR-STAT3-HK2 pathway in HCC treatment.

In summary, this study showed that STAT3 promotes glycolysis and regulates HK2 expression associated with the glycolysis of HepG2 and Hep3B cells. Interference of HK2 expression significantly reduces glycolysis of HepG2 and Hep3B cells. Rapamycin treatment of HepG2 and Hep3B cells decreases HK2 expression which is associated with reduced glycolysis. These findings suggest that the mTOR-STAT3-HK2 pathway is involved in the glycolysis of HCC and may thus provide potential multiple targets through interrupting glycolysis for HCC treatment.

## MATERIALS AND METHODS

### Plasmid constructs and siRNAs

Primers were synthesized by Sangon Biotech Co. Ltd (Shanghai, China) to amplify the whole DNA fragment of STAT3. The sequences were

5'-CCGGCTAGCATGGCCCAATGGAATCAG-3', and 5'-CCCAAGCTTTCACATGGGGGAGGTAGC-3' for forward primer and reverse primer, respectively. Recombinant plasmid pcDNA3.1(+)-EGFP-STAT3 and pcDNA3.1(+)-EGFP-Mock, designated as pcDNA3.1-STAT3 (pcDNA3.1-S) and pcDNA3.1-Mock (pcDNA3.1-M), respectively, were constructed by Integrated Medical Information (Xi'an, Shaanxi, China). The constructs were confirmed by DNA sequencing. The STAT3 siRNA and HK2 siRNA or the nonspecific negative control RNA were synthesized by Shanghai GeneChem Co., Ltd (Shanghai, China).

### Cell culture and transfection

The human hepatocellular carcinoma cell line HepG2 was obtained from Dr. Yawen Wang (Clinical Laboratory, The First Affiliated Hospital of Xi'an Jiaotong University, Xi'an, China), and the cell line Hep3B was purchased from Integrated Medical Information (Xi'an, Shaanxi, China). HepG2 cells and Hep3B cells were cultured in DMEM with 15% (for HepG2 cells) or 10% (for Hep3B cells) fetal bovine serum, 100 U/ml penicillin, and 100 µg/ml streptomycin at 37°C in a humidified atmosphere with 5% CO<sub>2</sub>.

pcDNA3.1-S or pcDNA3.1-M were transfected into cells with Lipofectamine 3000 (Invitrogen, Carlsbad, CA, USA).

Inhibition of the activity of mammalian target of rapamycin (mTOR), which is activated by STAT3,

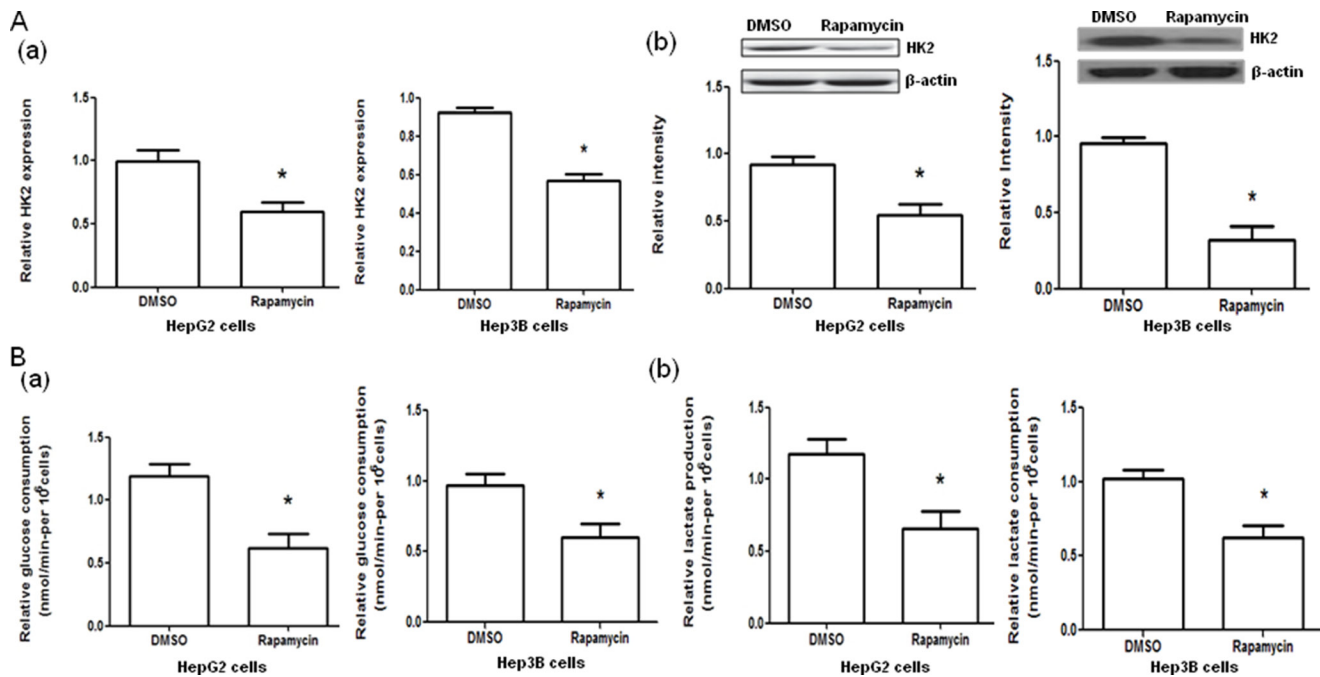

**Figure 4: Effect of rapamycin on hexokinase 2 (HK2) mRNA and protein expression and glucose consumption and lactate production in HepG2 and Hep3B cells.** (A) The HK2 mRNA (a) and protein (b) expression in HepG2 and Hep3B cells treated with DMSO or rapamycin. (B) The glucose consumption (a) and lactate production (b) in HepG2 and Hep3B cells treated with DMSO or rapamycin. \* $P < 0.05$ .

was performed by using rapamycin (Cell Signaling Technology, Danvers, MA, USA). Transfection of cells with STAT3 siRNA, HK2 siRNA or negative control RNA was carried out by using X-treme GENE siRNA Transfection Reagent (Roche, Nutley, NJ, USA) according to the manufacturer's instructions.

### Real-time quantitative PCR analysis

The total RNA was extracted from HepG2 or Hep3B cells by Trizol Reagent (TaKaRa Bio Inc., Dalian, China). RNA was subjected to reverse transcription reactions according to the manufacturer's instructions (Thermo Fisher Scientific Inc., Shanghai, China). RT-PCR was carried out with SYBR Premix Ex Taq II (Roche, Nutley, NJ, USA), and SLAN Real-time PCR System (Shanghai Hongshi Medical Technology Co., Ltd, Shanghai, China). Cycling conditions were as follows: 95°C for 10 min, then 40 cycles of 95°C for 10 sec, 60°C for 30 sec and 72°C for 30 sec and a final extension at 72°C for 2 min. The HK2 primers were: forward 5'-GCCTTCCGTCGCCAGCCTTTAGCC-3', and reverse 5'-GGACTCCTGCGCCGAGTTTCATG-3'. The STAT3 primers were: forward 5'-GAGAATCGTGGAGCTGT TAG-3', and reverse 5'-GACCAGCAACCTGACTT TAG-3'. The mRNA expression was normalized with GAPDH (forward 5'-GTATGACAACAGCCTCAAGA-3', and reverse 5'-GTCCTTCCACGATACCAAAG-3'). All experiments were carried out in triplicate. The RT-PCR results were analyzed using the  $2^{-\Delta\Delta Ct}$  method.

### Western blot analysis

Logarithmic growing cells were harvested for Western blotting 48 h after transfection. Proteins were probed with HK2, phospho-STAT3, or  $\beta$ -actin (Sigma-Aldrich Corporation, Shanghai, China) monoclonal antibody, and were assessed by BeyoECL Plus (Beyotime, Haimen, China). The films were scanned, and the density of the bands was quantified. Each experiment was performed in triplicate.

### Glucose consumption and lactate production assay

Glucose consumption and lactate production were analyzed as described previously [41]. The supernatants of cell culture media were collected. According to the manufacturer's instructions, glucose levels and lactate levels were determined using a Glucose Assay kit and a Lactate Assay kit (Sigma-Aldrich Corporation, Shanghai, China), respectively.

### Statistical analysis

All data were analyzed using SPSS statistics 17.0 version (SPSS Inc., Chicago, IL, USA). All results were

presented as mean  $\pm$  S.D. Comparisons of the differences between groups relative to their paired controls, were evaluated by a Student's *t*-test. Statistical significance was expressed as a *P* value.

### ACKNOWLEDGMENTS AND FUNDING

We thank Dr. Yawen Wang and Dr. Fang Li for their help during this study.

### CONFLICTS OF INTEREST

The authors have declared no conflicts of interest in relation to this manuscript.

### REFERENCES

1. Shaw RJ. Glucose metabolism and cancer. *Curr Opin Cell Biol.* 2006; 18:598–608.
2. Cairns RA, Harris IS, Mak TW. Regulation of cancer cell metabolism. *Nat Rev Cancer.* 2011; 11:85–95.
3. Warburg O. On the origin of cancer cells. *Science.* 1956; 123:309–314.
4. Kroemer G, Pouyssegur J. Tumor cell metabolism: cancer's Achilles' heel. *Cancer Cell.* 2008; 13:472–482.
5. Vander Heiden MG, Cantley LC, Thompson CB. Understanding the Warburg effect: the metabolic requirements of cell proliferation. *Science.* 2009; 324:1029–1033.
6. Kaelin WG, Thompson CB. Q&A: cancer: clues from cell metabolism. *Nature.* 2010; 465:562–564.
7. Robey RB, Hay N. Mitochondrial hexokinases, novel mediators of the antiapoptotic effects of growth factors and Akt. *Oncogene.* 2006; 25:4683–4696.
8. Mathupala SP, Ko YH, Pedersen PL. Hexokinase-2 bound to mitochondria: cancer's stygian link to the "Warburg Effect" and a pivotal target for effective therapy. *Semin Cancer Biol.* 2009; 19:17–24.
9. Mathupala SP, Ko YH, Pedersen PL. Hexokinase II: cancer's double-edged sword acting as both facilitator and gatekeeper of malignancy when bound to mitochondria. *Oncogene.* 2006; 25:4777–4786.
10. Pedersen PL, Mathupala S, Rempel A, Geschwind JF, Ko YH. Mitochondrial bound type II hexokinase: a key player in the growth and survival of many cancers and an ideal prospect for therapeutic intervention. *Biochim Biophys Acta.* 2002; 1555:14–20.
11. Ihle JN. STATs: signal transducers and activators of transcription. *Cell.* 1996; 84: 331–334.
12. Wang H, Lafdil F, Kong X, Gao B. Signal transducer and activator of transcription 3 in liver diseases: a novel therapeutic target. *Int J Biol Sci.* 2011; 7:536–550.
13. Grivennikov SI, Karin M. Dangerous liaisons: STAT3 and NF- $\kappa$ B collaboration and crosstalk in cancer. *Cytokine Growth Factor Rev.* 2010; 21:11–19.

14. Wang TX, Zhang ZQ, Cong Y, Shi XY, Liu YH, Zhao FL. Prosapogenin A induces apoptosis in human cancer cells *in vitro* via inhibition of the STAT3 signaling pathway and glycolysis. *Oncol Lett.* 2013; 6:1323–1328.
15. Dáňová K, Klapetková A, Kayserová J, Šedivá A, Špišek R, Jelínková LP. NF- $\kappa$ B, p38 MAPK, ERK1/2, mTOR, STAT3 and increased glycolysis regulate stability of paricalcitol/dexamethasone-generated tolerogenic dendritic cells in the inflammatory environment. *Oncotarget.* 2015; 6:14123–14138. doi: 10.18632/oncotarget.4234.
16. Li Z, Li X, Wu S, Xue M, Chen W. Long non-coding RNA UCA1 promotes glycolysis by upregulating hexokinase 2 through the mTOR-STAT3/microRNA143 pathway. *Cancer Sci.* 2014; 105:951–955.
17. Jiang S, Zhang LF, Zhang HW, Hu S, Lu MH, Liang S, Li B, Li Y, Li D, Wang ED, Liu MF. A novel miR-155/miR-143 cascade controls glycolysis by regulating hexokinase 2 in breast cancer cells. *EMBO J.* 2012; 31:1985–1998.
18. Li J, Liu T, Zhao L, Chen W, Hou H, Ye Z, Li X. Ginsenoside 20(S)-Rg3 inhibits the Warburg effect through STAT3 pathways in ovarian cancer cells. *Int J Oncol.* 2015; 46:775–781.
19. Kwee SA, Hernandez B, Chan O, Wong L. Choline kinase alpha and hexokinase-2 protein expression in hepatocellular carcinoma: association with survival. *PLoS One.* 2012; 7:e46591.
20. Zhang ZF, Feng XS, Chen H, Duan ZJ, Wang LX, Yang D, Liu PX, Zhang QP, Jin YL, Sun ZG, Liu H. Prognostic significance of synergistic hexokinase-2 and beta2-adrenergic receptor expression in human hepatocellular carcinoma after curative resection. *BMC Gastroenterol.* 2016; 16:57.
21. Ahn KJ, Hwang HS, Park JH, Bang SH, Kang WJ, Yun M, Lee JD. Evaluation of the role of hexokinase type II in cellular proliferation and apoptosis using human hepatocellular carcinoma cell lines. *J Nucl Med.* 2009; 50:1525–1532.
22. Li M, Wang W, Jin R, Zhang T, Li N, Han Q, Wei P, Liu Z. Differential association of STAT3 and HK-II expression in hepatitis B virus- and hepatitis C virus-related hepatocellular carcinoma. *J Med Virol.* 2016; 88:1552–1559.
23. Siveen KS, Nguyen AH, Lee JH, Li F, Singh SS, Kumar AP, Low G, Jha S, Tergaonkar V, Ahn KS, Sethi G. Negative regulation of signal transducer and activator of transcription-3 signalling cascade by lupeol inhibits growth and induces apoptosis in hepatocellular carcinoma cells. *Br J Cancer.* 2014; 111:1327–1337.
24. Beyoğlu D, Imbeaud S, Maurhofer O, Bioulac-Sage P, Zucman-Rossi J, Dufour JF, Idle JR. Tissue metabolomics of hepatocellular carcinoma: tumor energy metabolism and the role of transcriptomic classification. *Hepatology.* 2013; 58:229–238.
25. Bromberg JF, Wrzeszczynska MH, Devgan G, Zhao Y, Pestell RG, Albanese C, Darnell JE Jr. Stat3 as an oncogene. *Cell.* 1999; 98:295–303.
26. Yu H, Kortylewski M, Pardoll D. Crosstalk between cancer and immune cells: role of STAT3 in the tumour microenvironment. *Nat Rev Immunol.* 2007; 7:41–51.
27. Subramaniam A, Shanmugam MK, Perumal E, Li F, Nachiyappan A, Dai X, Swamy SN, Ahn KS, Kumar AP, Tan BK, Hui KM, Sethi G. Potential role of signal transducer and activator of transcription (STAT)3 signaling pathway in inflammation, survival, proliferation and invasion of hepatocellular carcinoma. *Biochim Biophys Acta.* 2013; 1835:46–60.
28. Subramaniam A, Shanmugam MK, Ong TH, Li F, Perumal E, Chen L, Vali S, Abbasi T, Kapoor S, Ahn KS, Kumar AP, Hui KM, Sethi G. Emodin inhibits growth and induces apoptosis in an orthotopic hepatocellular carcinoma model by blocking activation of STAT3. *Br J Pharmacol.* 2013; 170:807–821.
29. Rajendran P, Ong TH, Chen L, Li F, Shanmugam MK, Vali S, Abbasi T, Kapoor S, Sharma A, Kumar AP, Hui KM, Sethi G. Suppression of signal transducer and activator of transcription 3 activation by butein inhibits growth of human hepatocellular carcinoma *in vivo*. *Clin Cancer Res.* 2011; 17:1425–1439.
30. Pu X, Guo QX, Long HA, Yang CW. Effects of mTOR-STAT3 on the migration and invasion abilities of hepatoma cell and mTOR-STAT3 expression in liver cancer. *Asian Pac J Trop Med.* 2014; 7:368–372.
31. Yokogami K, Wakisaka S, Avruch J, Reeves SA. Serine phosphorylation and maximal activation of STAT3 during CNTF signaling is mediated by the rapamycin target mTOR. *Curr Biol.* 2000; 10:47–50.
32. Yang F, Zhang W, Li D, Zhan Q. Gadd45a suppresses tumor angiogenesis via inhibition of the mTOR/STAT3 protein pathway. *J Biol Chem.* 2013; 288:6552–6560.
33. Wu WY, Li J, Wu ZS, Zhang CL, Meng XL. STAT3 activation in monocytes accelerates liver cancer progression. *BMC Cancer.* 2011; 11:506.
34. Demaria M, Giorgi C, Lebedzinska M, Esposito G, D'Angeli L, Bartoli A, Gough DJ, Turkson J, Levy DE, Watson CJ, Wieckowski MR, Provero P, Pinton P, et al. A STAT3-mediated metabolic switch is involved in tumour transformation and STAT3 addiction. *Aging (Albany NY).* 2010; 2:823–842. doi: 10.18632/aging.100232.
35. Aggarwal BB, Kunnumakkara AB, Harikumar KB, Gupta SR, Tharakan ST, Koca C, Dey S, Sung B. Signal transducer and activator of transcription-3, inflammation, and cancer: how intimate is the relationship? *Ann NY Acad Sci.* 2009; 1171:59–76.
36. Zhang Y, Zhang JW, Lv GY, Xie SL, Wang GY. Effects of STAT3 gene silencing and rapamycin on apoptosis in hepatocarcinoma cells. *Int J Med Sci.* 2012; 9:216–224.
37. Dai W, Wang F, Lu J, Xia Y, He L, Chen K, Li J, Li S, Liu T, Zheng Y, Wang J, Lu W, Zhou Y, et al. By reducing hexokinase 2, resveratrol induces apoptosis in HCC cells addicted to aerobic glycolysis and inhibits tumor growth in mice. *Oncotarget.* 2015; 6:13703–13717. doi: 10.18632/oncotarget.3800.

38. Rajendran P, Li F, Shanmugam MK, Vali S, Abbasi T, Kapoor S, Ahn KS, Kumar AP, Sethi G. Honokiol inhibits signal transducer and activator of transcription-3 signaling, proliferation, and survival of hepatocellular carcinoma cells via the protein tyrosine phosphatase SHP-1. *J Cell Physiol.* 2012; 227:2184–2195.
39. Wang XH, Liu BR, Qu B, Xing H, Gao SL, Yin JM, Wang XF, Cheng YQ. Silencing STAT3 may inhibit cell growth through regulating signaling pathway, telomerase, cell cycle, apoptosis and angiogenesis in hepatocellular carcinoma: potential uses for gene therapy. *Neoplasma.* 2011; 58:158–171.
40. Yang J, Cai X, Lu W, Hu C, Xu X, Yu Q, Cao P. Evodiamine inhibits STAT3 signaling by inducing phosphatase shatterproof 1 in hepatocellular carcinoma cells. *Cancer Lett.* 2013; 328:243–251.
41. Kawauchi K, Araki K, Tobiume K, Tanaka N. p53 regulates glucose metabolism through an IKK-NF-kappaB pathway and inhibits cell transformation. *Nat Cell Biol.* 2008; 10:611–618.
